# Supplementary material for: The skin is a significant but overlooked anatomical reservoir for vector-borne African trypanosomes
Source: eLife. 2016 Sep 22;5:e17716. doi: 10.7554/eLife.17716 (PMC5065312; doi:10.7554/eLife.17716)
Supplement: Figure 1—source data 1. — brucei infection, five mice were culled (three infected, two control) and skin sections stained with parasite-specific anti-IGS65 antibody. Parasite burden was assessed by two pathologists blinded to group assignment and experimental procedures. Presence of parasites defined as intravascular (parasites within the lumen of dermal or subcutaneous small to medium-sized vessels) and extravascular (parasites located outside blood vessels, scattered in the connective tissue of the dermis or in the subcutis) was evaluated in 5 high-power fields at x40 magnification with a 0 to 3 semi-quantitative grading scale (0 = no parasites detectable; 1 = low numbers of parasites; 2 = moderate numbers of parasites; 3 = large numbers of parasites). DOI: http://dx.doi.org/10.7554/eLife.17716.003 [file elife-17716-fig1-data1.xlsx]

## Sheet: IHC_parasites
				HPFs x40 with semiquantitative parasite burden score #
Mouse ID	Sample ID	skin dorsum	present (1) / absent (0)*	HPF-1	HPF-2	HPF-3	HPF-4	HPF-5	Parasite burden score #
Time point									total	average
Day 3
D3 C1	15/145	intravascular	0	0	0	0	0	0	0	0
		extravascular	0	0	0	0	0	0	0	0
D3 C2	15/146	intravascular	0	0	0	0	0	0	0	0
		extravascular	0	0	0	0	0	0	0	0
D3 I1	15/147	intravascular	0	0	0	0	0	0	0	0
		extravascular	0	0	0	0	0	0	0	0
D3 I2	15/148	intravascular	0	0	0	0	0	0	0	0
		extravascular	0	0	0	0	0	0	0	0
D3 I3	15/149	intravascular	0	0	0	0	0	0	0	0
		extravascular	0	0	0	0	0	0	0	0
Day 6
D6 C1	15/150	intravascular	0	0	0	0	0	0	0	0
		extravascular	0	0	0	0	0	0	0	0
D6 C2	15/151	intravascular	0	0	0	0	0	0	0	0
		extravascular	0	0	0	0	0	0	0	0
D6 I1	15/152	intravascular	0	0	0	0	0	0	0	0
		extravascular	0	0	0	0	0	0	0	0
D6 I2	15/153	intravascular	0	0	0	0	0	0	0	0
		extravascular	0	0	0	0	0	0	0	0
D6 I3	15/154	intravascular	0	0	0	0	0	0	0	0
		extravascular	0	0	0	0	0	0	0	0
Day 9
D9 C1	15/155	intravascular	0	0	0	0	0	0	0	0
		extravascular	0	0	0	0	0	0	0	0
D9 C2	15/156	intravascular	0	0	0	0	0	0	0	0
		extravascular	0	0	0	0	0	0	0	0
D9 I1	15/157	intravascular	0	0	0	0	0	0	0	0
		extravascular	0	0	0	0	0	0	0	0
D9 I2	15/158	intravascular	0	0	0	0	0	0	0	0
		extravascular	0	0	0	0	0	0	0	0
D9 I3	15/159	intravascular	0	0	0	0	0	0	0	0
		extravascular	0	0	0	0	0	0	0	0
				HPFs x40 with semiquantitative parasite burden score #
Mouse ID	Sample ID	skin dorsum	present (1) / absent (0)*	HPF-1	HPF-2	HPF-3	HPF-4	HPF-5	Parasite burden #
Time point									total	average
Day 12
D12 C1	15/265	intravascular	0	0	0	0	0	0	0	0
		extravascular	0	0	0	0	0	0	0	0
D12 C2	15/266	intravascular	0	0	0	0	0	0	0	0
		extravascular	0	0	0	0	0	0	0	0
D12 I1	15/267	intravascular	1	1	1	0	1	1	4	0.8
		extravascular	1	0	1	0	0	0	1	0.2
D12 I2	15/268	intravascular	1	0	0	1	0	0	1	0.2
		extravascular	1	0	1	0	1	0	2	0.4
D12 I3	15/269	intravascular	1	0	1	1	0	0	2	0.4
		extravascular	1	0	1	0	1	0	2	0.4
Day 15
D15 C1	15/270	intravascular	0	0	0	0	0	0	0	0
		extravascular	0	0	0	0	0	0	0	0
D15 C2	15/271	intravascular	0	0	0	0	0	0	0	0
		extravascular	0	0	0	0	0	0	0	0
D15 I1	15/272	intravascular	1	0	1	1	0	0	2	0.4
		extravascular	1	2	1	1	0	1	5	1
D15 I2	15/273	intravascular	1	0	1	1	0	1	3	0.6
		extravascular	1	1	0	1	1	0	3	0.6
D15 I3	15/274	intravascular	1	2	1	0	0	0	3	0.6
		extravascular	1	2	2	2	0	0	6	1.2
Day 18
D18 C1	15/313	intravascular	0	0	0	0	0	0	0	0
		extravascular	0	0	0	0	0	0	0	0
D18 C2	15/314	intravascular	0	0	0	0	0	0	0	0
		extravascular	0	0	0	0	0	0	0	0
D18 I1	15/315	intravascular	0	0	0	0	0	0	0	0
		extravascular	0	0	0	0	0	0	0	0
D18 I2	15/316	intravascular	0	0	0	0	0	0	0	0
		extravascular	0	0	0	0	0	0	0	0
D18 I3	15/317	intravascular	1	1	1	0	0	0	2	0.4
		extravascular	0	0	0	0	0	0	0	0
				HPFs x40 with semiquantitative parasite burden score #
Mouse ID	Sample ID	skin dorsum	present (1) / absent (0)*	HPF-1	HPF-2	HPF-3	HPF-4	HPF-5	Parasite burden #
Time point									total	average
Day 21
D21 C1	15/318	intravascular	0	0	0	0	0	0	0	0
		extravascular	0	0	0	0	0	0	0	0
D21 C2	15/319	intravascular	0	0	0	0	0	0	0	0
		extravascular	0	0	0	0	0	0	0	0
D21 I1	15/320	intravascular	0	0	0	0	0	0	0	0
		extravascular	1	0	0	1	1	1	3	0.6
D21 I2	15/321	intravascular	1	1	0	0	1	1	3	0.6
		extravascular	0	0	0	0	0	0	0	0
D21 I3	15/322	intravascular	1	0	1	0	1	0	2	0.4
		extravascular	1	0	0	0	1	0	1	0.2
Day 24
D24 C1	15/323	intravascular	0	0	0	0	0	0	0	0
		extravascular	0	0	0	0	0	0	0	0
D24 C2	15/324	intravascular	0	0	0	0	0	0	0	0
		extravascular	0	0	0	0	0	0	0	0
D24 I1	15/325	intravascular	0	0	0	0	0	0	0	0
		extravascular	1	2	2	2	2	2	10	2
D24 I2	15/326	intravascular	1	1	1	0	1	1	4	0.8
		extravascular	1	1	0	1	0	0	2	0.4
D24 I3	15/327	intravascular	1	0	1	1	0	0	2	0.4
		extravascular	0	0	0	0	0	0	0	0
Day 27
D27 C1	15/422	intravascular	0	0	0	0	0	0	0	0
		extravascular	0	0	0	0	0	0	0	0
D27 C2	15/423	intravascular	0	0	0	0	0	0	0	0
		extravascular	0	0	0	0	0	0	0	0
D27 I1	15/424	intravascular	0	0	0	0	0	0	0	0
		extravascular	0	0	0	0	0	0	0	0
D27 I2	15/425	intravascular	0	0	0	0	0	0	0	0
		extravascular	0	0	0	0	0	0	0	0
D27 I3	15/426	intravascular	1	2	1	1	0	0	4	0.8
		extravascular	1	1	0	0	0	1	2	0.4
				HPFs x40 with semiquantitative parasite burden score #
Mouse ID	Sample ID	skin dorsum	present (1) / absent (0)*	HPF-1	HPF-2	HPF-3	HPF-4	HPF-5	Parasite burden #
Time point									total	average
Day 30
C1	15/427	intravascular	0	0	0	0	0	0	0	0
		extravascular	0	0	0	0	0	0	0	0
C2	15/428	intravascular	0	0	0	0	0	0	0	0
		extravascular	0	0	0	0	0	0	0	0
I1	15/429	intravascular	1	0	2	1	0	2	5	1
		extravascular	0	0	0	0	0	0	0	0
I2	15/430	intravascular	1	0	0	1	1	0	2	0.4
		extravascular	0	0	0	0	0	0	0	0
I3	15/431	intravascular	1	0	1	0	1	1	3	0.6
		extravascular	1	1	0	0	0	1	2	0.4
I4	15/432	intravascular	1	1	0	0	1	1	3	0.6
		extravascular	0	0	0	0	0	0	0	0
Day 33
C1	15/433	intravascular	0	0	0	0	0	0	0	0
		extravascular	0	0	0	0	0	0	0	0
C2	15/434	intravascular	0	0	0	0	0	0	0	0
		extravascular	0	0	0	0	0	0	0	0
I1	15/435	intravascular	0	0	0	0	0	0	0	0
		extravascular	0	0	0	0	0	0	0	0
I2	15/436	intravascular	1	1	1	1	1	1	5	1
		extravascular	1	1	1	0	1	0	3	0.6
I3	15/437	intravascular	1	1	1	1	1	0	4	0.8
		extravascular	1	1	0	1	0	0	2	0.4
I4	15/438	intravascular	1	1	0	1	0	0	2	0.4
		extravascular	0	0	0	0	0	0	0	0
Day 36
C1	15/696	intravascular	0	0	0	0	0	0	0	0
		extravascular	0	0	0	0	0	0	0	0
C2	15/697	intravascular	0	0	0	0	0	0	0	0
		extravascular	0	0	0	0	0	0	0	0
I1	15/698	intravascular	1	1	1	1	1	1	5	1
		extravascular	0	0	0	0	0	0	0	0
I2	15/699	intravascular	0	0	0	0	0	0	0	0
		extravascular	0	0	0	0	0	0	0	0
I3	15/700	intravascular	1	1	0	0	1	1	3	0.6
		extravascular	1	0	1	1	1	0	3	0.6
I4	15/701	intravascular	1	0	0	0	1	1	2	0.4
		extravascular	0	0	0	0	0	0	0	0
* parasites within the specified anatomical compartments (intravascualr or extravascular )in the skin samples stained with anti-IGS65 antibody are referred as
0 = absent (no parasites detectable)
1 = present
# presence of parasites in the skin samples stained with anti-IGS65 antibody is assessed in each x40 HPF according to the following semiquantitative scoring system
0 = absent (no parasites detectable)
1 = low numbers
2 = moderate numbers
3 = large numbers
total and average scores from the assessment of 5 HPFs x40 are reported
