# Supplementary material for: The skin is a significant but overlooked anatomical reservoir for vector-borne African trypanosomes
Source: eLife. 2016 Sep 22;5:e17716. doi: 10.7554/eLife.17716 (PMC5065312; doi:10.7554/eLife.17716)
Supplement: Figure 1—source data 2. — brucei infection was estimated using phase microscopy and methodology outlined in (Lumsden, 1963). DOI: http://dx.doi.org/10.7554/eLife.17716.004 [file elife-17716-fig1-data2.xlsx]

## Sheet: Sheet1
													Day
Mouse	3	4	5	6	7	8	9	10	11	12	13	14	15	16	17	18	19	20	21	22	23	24	25	26	27	28	29	30	30	32	33	34	35
D3I0	250089
D3I2	250089
D3I3	250089
D6I0	250089	995262	5.84893e+06	3.06228e+07
D6I2	0	250089	7.94328e+06	3.06228e+07
D6I3	0	3.98007e+06	5.84893e+06	5.84893e+06
D9I0	250089	500087	0	3.98007e+06	500087	0	0
D9I2	500087	5.84893e+06	7.94328e+06	5.84893e+06	0	0	0
D9I3	250089	500087	7.94328e+06	7.94328e+06	3.98007e+06	0	0
D02I0	250089	7.94328e+06	7.94328e+06	0	250089	0	0	995262	3.06228e+07	6.30957e+07
D02I2	250089	7.94328e+06	7.94328e+06	3.98007e+06	250089	0	250089	995262	3.06228e+07	6.30957e+07
D02I3	250089	5.84893e+06	7.94328e+06	3.98007e+06	250089	0	250089	995262	3.06228e+07	6.30957e+07
D05I0	250089	5.84893e+06	3.06228e+07	7.94328e+06	0	0	250089	7.94328e+06	3.06228e+07	6.30957e+07	6.30957e+07	2.58925e+07	6.30957e+07
D05I2	0	5.84893e+06	3.06228e+07	7.94328e+06	0	0	250089	7.94328e+06	3.06228e+07	6.30957e+07	6.30957e+07	3.06228e+07	6.30957e+07
D05I3	0	7.94328e+06	3.06228e+07	7.94328e+06	995262	0	0	250089	7.94328e+06	3.06228e+07	6.30957e+07	2.58925e+07	2.58925e+07
D08I0	0	3.06228e+06	5.84893e+06	5.84893e+06	250089	0	7.94328e+06	5.84893e+06	3.06228e+07	6.30957e+07	2.58925e+07	2.58925e+07	3.06228e+07	3.06228e+07	7.94328e+06	7.94328e+06
D08I2	500087	5.84893e+06	7.94328e+06	5.84893e+06	0	0	250089	7.94328e+06	6.30957e+07	6.30957e+07	2.58925e+07	6.30957e+07	6.30957e+07	3.06228e+07	6.30957e+07	7.94328e+06
D08I3	250089	3.98007e+06	5.84893e+06	7.94328e+06	0	0	250089	0	5.84893e+06	3.06228e+07	2.58925e+07	2.58925e+07	2.58925e+07	5.84893e+06	5.84893e+06	6.30957e+07
D20I0	0	250089	995262	3.98007e+06	250089	0	0	0	250089	7.94328e+06	3.06228e+07	3.06228e+07	6.30957e+07	5.84893e+06	5.84893e+06	7.94328e+06	5.84893e+06	0	7.94328e+06
D20I2	250089	7.94328e+06	5.84893e+06	5.84893e+06	0	0	995262	7.94328e+06	3.06228e+07	2.58925e+07	2.58925e+07	2.58925e+07	6.30957e+07	5.84893e+06	5.84893e+06	6.30957e+07	6.30957e+07	0	3.06228e+07
D20I3	250089	7.94328e+06	5.84893e+06	5.84893e+06	250089	0	250089	7.94328e+06	3.06228e+07	6.30957e+07	2.58925e+07	2.58925e+07	6.30957e+07	6.30957e+07	6.30957e+07	6.30957e+07	3.06228e+07	7.94328e+06	5.84893e+06
D24I0	250089	7.94328e+06	3.98007e+06	3.98007e+06	500087	0	995262	7.94328e+06	6.30957e+07	6.30957e+07	2.58925e+07	6.30957e+07	6.30957e+07	6.30957e+07	6.30957e+07	6.30957e+07	6.30957e+07	6.30957e+07	6.30957e+07	5.84893e+06	3.06228e+07	7.94328e+06
D24I2	500087	7.94328e+06	5.84893e+06	7.94328e+06	0	250089	995262	5.84893e+06	6.30957e+07	6.30957e+07	6.30957e+07	3.06228e+07	6.30957e+07	6.30957e+07	6.30957e+07	3.06228e+07	5.84893e+06	7.94328e+06	3.98007e+06	995262	5.84893e+06	5.84893e+06
D24I3	0	3.98007e+06	7.94328e+06	7.94328e+06	0	0	0	250089	3.98007e+06	3.06228e+07	6.30957e+07	2.58925e+07	6.30957e+07	6.30957e+07	6.30957e+07	6.30957e+07	3.06228e+07	5.84893e+06	5.84893e+06	3.98007e+06	5.84893e+06	995262
D27I0	0	0	0	3.98007e+06	3.98007e+06	0	0	0	0	0	7.94328e+06	6.30957e+07	3.06228e+07	3.06228e+07	3.06228e+07	7.94328e+06	5.84893e+06	7.94328e+06	7.94328e+06	3.98007e+06	3.98007e+06	995262	7.94328e+06	3.06228e+07	3.06228e+07
D27I2	500087	7.94328e+06	7.94328e+06	7.94328e+06	0	0	0	0	5.84893e+06	6.30957e+07	2.58925e+07	6.30957e+07	3.06228e+07	3.06228e+07	3.06228e+07	6.30957e+07	6.30957e+07	2.58925e+07	6.30957e+07	6.30957e+07	3.06228e+07	995262	0	7.94328e+06	3.98007e+06
D27I3	250089	3.98007e+06	3.06228e+07	3.06228e+07	0	250089	250089	7.94328e+06	3.06228e+07	2.58925e+07	2.58925e+07	2.58925e+07	2.58925e+07	2.58925e+07	2.58925e+07	2.58925e+07	2.58925e+07	2.58925e+07	6.30957e+07	6.30957e+07	2.58925e+07	2.58925e+07	6.30957e+07	2.58925e+07	2.58925e+07
D30I0	250089	0	3.98007e+06	7.94328e+06	995262	0	0	250089	5.84893e+06	3.06228e+07	6.30957e+07	6.30957e+07	6.30957e+07	6.30957e+07	3.06228e+07	3.06228e+07	6.30957e+07	6.30957e+07	3.06228e+07	2.58925e+07	6.30957e+07	2.58925e+07	6.30957e+07	2.58925e+07	6.30957e+07	6.30957e+07	2.58925e+07	2.50089e+08
D30I2	0	0	5.84893e+06	7.94328e+06	0	250089	250089	7.94328e+06	3.06228e+07	3.06228e+07	3.06228e+07	6.30957e+07	6.30957e+07	5.84893e+06	0	3.06228e+07	5.84893e+06	7.94328e+06	3.98007e+06	7.94328e+06	7.94328e+06	7.94328e+06	5.84893e+06	7.94328e+06	7.94328e+06	7.94328e+06	5.84893e+06	5.84893e+06
D30I3	250089	0	5.84893e+06	5.84893e+06	995262	0	0	250089	7.94328e+06	6.30957e+07	2.58925e+07	2.58925e+07	6.30957e+07	6.30957e+07	995262	3.06228e+07	3.06228e+07	3.06228e+07	3.06228e+07	6.30957e+07	3.06228e+07	6.30957e+07	500087	7.94328e+06	3.06228e+07	6.30957e+07	6.30957e+07	2.58925e+07
D33I0	250089	250089	3.98007e+06	7.94328e+06	250089	0	0	250089	3.98007e+06	5.84893e+06	6.30957e+07	6.30957e+07	3.06228e+07	7.94328e+06	6.30957e+07	3.06228e+07	3.06228e+07	3.06228e+07	3.06228e+07	5.84893e+06	995262	7.94328e+06	0	500087	3.06228e+07	6.30957e+07	2.58925e+07	2.58925e+07	6.30957e+07	2.58925e+07	2.58925e+07
D33I2	250089	3.98007e+06	0	3.98007e+06	3.98007e+06	250089	250089	995262	3.06228e+07	3.06228e+07	3.06228e+07	2.58925e+07	2.58925e+07	5.84893e+06	5.84893e+06	7.94328e+06	5.84893e+06	3.06228e+07	3.06228e+07	6.30957e+07	6.30957e+07	7.94328e+06	5.84893e+06	3.06228e+07	5.84893e+06	5.84893e+06	3.06228e+07	2.58925e+07	2.58925e+07	2.58925e+07	2.58925e+07
D33I3	0	0	0	250089	250089	0	0	0	0	0	250089	3.98007e+06	6.30957e+07	2.58925e+07	6.30957e+07	7.94328e+06	3.06228e+07	3.06228e+07	3.06228e+07	500087	995262	0	3.98007e+06	7.94328e+06	5.84893e+06	5.84893e+06	5.84893e+06	5.84893e+06	6.30957e+07	3.06228e+07	6.30957e+07
D35I0	0	500087	3.98007e+06	995262	0	0	0	250089	5.84893e+06	3.06228e+07	2.58925e+07	2.58925e+07	3.06228e+07	3.06228e+07	7.94328e+06	6.30957e+07	5.84893e+06	3.06228e+07	3.06228e+07	6.30957e+07	6.30957e+07	3.06228e+07	3.06228e+07	5.84893e+06	5.84893e+06	3.06228e+07	5.84893e+06	6.30957e+07	6.30957e+07	6.30957e+07	2.58925e+07	2.58925e+07
D35I2	0	0	500087	7.94328e+06	7.94328e+06	0	0	0	0	0	250089	995262	3.06228e+07	995262	2.58925e+07	0	0	250089	3.98007e+06	7.94328e+06	3.06228e+07	6.30957e+07	5.84893e+06	3.06228e+07	5.84893e+06	7.94328e+06	5.84893e+06	5.84893e+06	5.84893e+06	5.84893e+06	3.98007e+06	0
D35I3	250089	500087	5.84893e+06	7.94328e+06	250089	0	0	250089	3.06228e+07	6.30957e+07	2.50089e+08	2.58925e+07	2.58925e+07	6.30957e+07	6.30957e+07	6.30957e+07	6.30957e+07	2.58925e+07	6.30957e+07	6.30957e+07	2.58925e+07	7.94328e+06	7.94328e+06	0	7.94328e+06	5.84893e+06	3.06228e+07	6.30957e+07	6.30957e+07	5.84893e+06	3.06228e+07	5.84893e+06
