# Supplementary material for: The skin is a significant but overlooked anatomical reservoir for vector-borne African trypanosomes
Source: eLife. 2016 Sep 22;5:e17716. doi: 10.7554/eLife.17716 (PMC5065312; doi:10.7554/eLife.17716)
Supplement: Supplementary file 1. — The extent of cutaneous inflammatory cell infiltration during the 36-day STIB247 experiment was assessed on haematoxylin and eosin stained sections with a semi-quantitative scoring system applied by two pathologists blinded to group assignment and experimental procedures.The extent of mixed inflammatory cell infiltration in the dermis and/or subcutis was assessed on a 0 to 3 grading scale (0 = no inflammation or only few scattered leukocytes; 1 = low numbers of inflammatory cells; 2 = moderate numbers of inflammatory cells; 3 = large numbers of inflammatory cells). Ten high-power fields (HPFs) were scored for each skin sample. DOI: http://dx.doi.org/10.7554/eLife.17716.022 [file elife-17716-supp1.xlsx]

## Sheet: HE_inflammation
			HPFs x40 with semiquantitative skin inflammation score #
Mouse ID	Sample ID		HPF-1	HPF-2	HPF-3	HPF-4	HPF-5	HPF-6	HPF-7	HPF-8	HPF-9	HPF-10	Skin inflammation score #
Time point													total	average
Day 3
D3 C1	15/145		0	0	0	0	0	0	0	1	0	1	2	0.2
D3 C2	15/146		0	0	0	0	0	0	0	0	0	0	0	0
D3 I1	15/147		0	0	0	0	0	0	0	0	0	0	0	0
D3 I2	15/148		0	0	0	0	0	0	0	0	0	0	0	0
D3 I3	15/149		0	0	0	0	0	0	0	0	0	0	0	0
Day 6
D6 C1	15/150		0	0	0	0	0	0	0	0	0	0	0	0
D6 C2	15/151		1	0	0	0	0	1	0	0	0	0	2	0.2
D6 I1	15/152		0	0	0	0	0	0	0	0	0	0	0	0
D6 I2	15/153	(a)	0	0	0	0	0	0	0	0	0	0	0	0
D6 I3	15/154		1	1	0	0	0	1	0	1	0	0	4	0.4
Day 9
D9 C1	15/155		0	1	0	0	0	0	0	0	0	0	1	0.1
D9 C2	15/156		0	1	0	0	0	0	0	0	0	0	1	0.1
D9 I1	15/157		0	0	0	0	0	0	0	0	0	0	0	0
D9 I2	15/158		1	0	0	0	0	0	0	0	0	0	1	0.1
D9 I3	15/159		0	0	0	0	0	0	0	0	0	0	0	0
Day 12
D12 C1	15/265		0	0	0	0	0	0	0	1	0	1	2	0.2
D12 C2	15/266		0	0	0	0	0	1	1	0	0	0	2	0.2
D12 I1	15/267		1	0	0	0	0	0	0	0	1	0	2	0.2
D12 I2	15/268		0	0	0	0	0	0	0	1	0	1	2	0.2
D12 I3	15/269		0	0	1	0	0	0	0	0	0	0	1	0.1
Day 15
D15 C1	15/270		0	0	0	0	0	0	0	0	0	0	0	0
D15 C2	15/271		0	0	1	0	0	0	0	1	1	1	4	0.4
D15 I1	15/272		1	0	0	0	0	0	0	0	0	0	1	0.1
D15 I2	15/273		1	1	0	0	1	0	0	0	0	0	3	0.3
D15 I3	15/274		0	1	0	0	0	0	0	0	0	0	1	0.1
			HPFs x40 with semiquantitative skin inflammation score #
Mouse ID	Sample ID		HPF-1	HPF-2	HPF-3	HPF-4	HPF-5	HPF-6	HPF-7	HPF-8	HPF-9	HPF-10	Skin inflammation score #
Time point													total	average
Day 18
D18 C1	15/313		0	0	0	1	0	0	0	1	0	0	2	0.2
D18 C2	15/314		0	0	0	0	0	1	0	0	0	0	1	0.1
D18 I1	15/315		0	0	0	1	0	0	1	0	0	0	2	0.2
D18 I2	15/316		1	1	0	0	0	0	0	0	1	0	3	0.3
D18 I3	15/317		0	0	0	0	0	0	0	1	0	1	2	0.2
Day 21
D21 C1	15/318		2	0	0	0	0	0	1	0	0	0	3	0.3
D21 C2	15/319		0	0	0	0	0	0	0	1	0	0	1	0.1
D21 I1	15/320		0	0	1	0	1	0	0	1	0	0	3	0.3
D21 I2	15/321		0	0	1	0	0	0	1	0	0	0	2	0.2
D21 I3	15/322		0	0	0	0	0	0	0	1	0	1	2	0.2
Day 24
D24 C1	15/323		0	1	0	0	0	0	0	0	0	0	1	0.1
D24 C2	15/324		0	0	0	0	0	0	0	0	0	0	0	0
D24 I1	15/325		1	0	0	0	1	1	2	1	2	1	9	0.9
D24 I2	15/326		0	0	0	1	0	1	1	1	0	1	5	0.5
D24 I3	15/327		2	1	0	1	1	0	1	1	0	1	8	0.8
Day 27
D27 C1	15/422		0	0	0	1	0	0	0	0	0	0	1	0.1
D27 C2	15/423		0	0	0	0	0	0	0	0	0	0	0	0
D27 I1	15/424		0	0	0	0	0	0	0	0	0	0	0	0
D27 I2	15/425		1	0	0	0	0	0	0	0	0	0	1	0.1
D27 I3	15/426		0	1	0	0	0	0	0	0	0	0	1	0.1
Day 30
D30 C1	15/427		0	0	0	0	0	0	0	0	0	0	0	0
D30 C2	15/428		0	0	1	0	0	0	0	0	0	0	1	0.1
D30 I1	15/429		0	0	0	0	2	0	0	0	0	0	2	0.2
D30 I2	15/430		0	0	0	0	0	0	0	0	0	0	0	0
D30 I3	15/431		0	0	0	0	0	0	0	0	0	0	0	0
D30 I4	15/432		0	1	0	0	0	0	0	0	0	0	1	0.1
			HPFs x40 with semiquantitative skin inflammation score #
Mouse ID	Sample ID		HPF-1	HPF-2	HPF-3	HPF-4	HPF-5	HPF-6	HPF-7	HPF-8	HPF-9	HPF-10	Skin inflammation score #
Time point													total	average
Day 33
D33 C1	15/433		0	0	0	0	0	0	0	0	0	0	0	0
D33 C2	15/434		0	0	0	0	0	0	0	1	0	0	1	0.1
D33 I1	15/435		0	0	0	0	0	0	0	0	0	0	0	0
D33 I2	15/436		0	0	0	0	0	0	0	0	0	0	0	0
D33 I3	15/437		0	1	0	1	0	0	1	0	0	0	3	0.3
D33 I4	15/438		0	0	0	0	0	0	0	0	0	0	0	0
Day 36
D36 C1	15/696		1	0	0	0	0	0	0	1	0	0	2	0.2
D36 C2	15/697		0	0	0	0	0	0	0	0	0	0	0	0
D36 I1	15/698		0	0	0	0	0	0	1	0	0	0	1	0.1
D36 I2	15/699		0	0	0	0	0	0	0	0	0	0	0	0
D36 I3	15/700		0	0	0	0	0	0	0	0	0	0	0	0
D36 I4	15/701		0	0	0	0	0	0	0	0	0	0	0	0
# extent of inflammation in the skin samples stained with HE is assessed in each x40 HPF according to the following semiquantitative scoring system
0 = absent or only rare leukocytes present
1 = mild (low numbers of mixed inflammatory cells)
2 = moderate (moderate numbers of mixed inflammatory cells)
3 = marked (large numbers of inflammatory cells)
total and average scores from the assessment of 10 HPFs x40 are reported
(a) mouse D6 I2 shows multifocal to extensive infiltrates of medium sized neoplastic lymphoid cells in the deep dermis/subcutis, panniculus carnosus muscle and mammary fat pad
