# Supplementary material for: The skin is a significant but overlooked anatomical reservoir for vector-borne African trypanosomes
Source: eLife. 2016 Sep 22;5:e17716. doi: 10.7554/eLife.17716 (PMC5065312; doi:10.7554/eLife.17716)
Supplement: Supplementary file 2. — The extent of cutaneous inflammatory cell infiltration at day 10 of infection by strain TREU927 experiment was assessed on haematoxylin and eosin stained sections with a semi-quantitative scoring system applied by two pathologists blinded to group assignment and experimental procedures. The extent of mixed inflammatory cell infiltration in the dermis and/or subcutis was assessed on a 0 to 3 grading scale (0 = no inflammation or only few scattered leukocytes; 1 = low numbers of inflammatory cells; 2 = moderate numbers of inflammatory cells; 3 = large numbers of inflammatory cells). Ten high-power fields (HPFs) were scored for each skin sample. DOI: http://dx.doi.org/10.7554/eLife.17716.023 [file elife-17716-supp2.xlsx]

## Sheet: IHC_parasites
		HPFs x40 with semiquantitative parasite burden score #
Mouse ID	Sample ID	HPF-1	HPF-2	HPF-3	HPF-4	HPF-5	HPF-6	HPF-7	HPF-8	HPF-9	HPF-10	HPF-11	HPF-12	HPF-13	HPF-14	HPF-15	HPF-16	HPF-17	HPF-18	HPF-19	HPF-20		Inflammation score #
ctrl1	14/2806	0	0	0	0	0	0	0	0	0	1	0	0	0	0	0	0	0	0	0	0		1	0.05
ctrl2	14/2807	1	0	1	0	0	1	0	0	0	0	1	0	0	0	0	1	0	0	0	0		5	0.25
ctrl3	14/2808	1	0	0	0	0	0	0	0	0	0	0	0	0	0	0	0	0	0	0	0		1	0.05
927-1	14/2812	1	1	0	2	2	0	0	0	1	2	2	1	1	1	2	0	1	0	2	0		19	0.95
927-2	14/2813	0	1	1	1	1	1	2	2	0	2	1	1	1	1	1	1	1	0	1	0		19	0.95
927-3	14/2814	1	1	0	1	1	1	1	1	1	1	0	1	1	1	0	0	1	1	0	0		14	0.7
* inflammatory cell infiltration was assessed in the skin samples from the dorsum according to the following semiquantitative scoring system
0 = absent (no parasites detectable)
1 = present
# presence of parasites in the skin samples stained with anti-IGS65 antibody is assessed in each x40 HPF according to the following semiquantitative scoring system
0 = absent
1 = mild
2 = moderate
3 = marked
total and average scores from the assessment of 20 HPFs x40 are reported
