# Supplementary material for: The skin is a significant but overlooked anatomical reservoir for vector-borne African trypanosomes
Source: eLife. 2016 Sep 22;5:e17716. doi: 10.7554/eLife.17716 (PMC5065312; doi:10.7554/eLife.17716)
Supplement: Supplementary file 3. — The relative abundance stumpy cells in the skin of three BALB/c was estimated using qPCR at day 11 post-inoculation with T.b. brucei strain TREU927. Mice were culled and perfused to remove blood parasites and a 2 cm (Fakhar, 2013) region of skin removed from the flank. The tissue was homogenised and RNA extracted. 100 ng of RNA from each sample was reverse-transcribed and qPCR performed to estimate the cycle thresholds (CT) of the stumpy marker PAD1 and the endogenous control ZFP3. As CT is inversely proportional to amount of target cDNA in the sample and PAD1 and ZFP3 have similar qPCR efficiencies, a comparison of the delta (∆) of CT between PAD1 and ZFP3 transcripts reveals the relative ratio of PAD1 to ZFP3 transcripts and hence the proportion of differentiated parasites transcribing the PAD1 gene. DOI: http://dx.doi.org/10.7554/eLife.17716.024 [file elife-17716-supp3.xlsx]

## Sheet: Sheet1
	Inf1 Skin
	PAD1 CT	ZFP3 CT	Delta CT	Mean Delta CT
	27.76	26.33	1.43		Skin Mean Delta CT=	2.4
	28.89	26.25	2.64		Skin 2^-(Mean Delta CT)	0.189465
	27.92	26.4	1.52
Mean	28.19	26.3267	1.86333	1.86333
SD	0.611474	0.0750555
	Inf2 Skin
	PAD1 CT	ZFP3 CT	Delta CT
	28.24	24.86	3.38
	27.37	25.1	2.27
	28.76	24.91	3.85
Mean	28.1233	24.9567	3.16667	3.16667
SD	0.702306	0.126623
	Inf3 Skin
	PAD1 CT	ZFP3 CT	Delta CT
	36.97	34.24	2.73
	37.13	35.16	1.97
	35.76	33.95	1.81
Mean	36.62	34.45	2.17	2.17
SD	0.749066	0.631744
