# Supplementary material for: The skin is a significant but overlooked anatomical reservoir for vector-borne African trypanosomes
Source: eLife. 2016 Sep 22;5:e17716. doi: 10.7554/eLife.17716 (PMC5065312; doi:10.7554/eLife.17716)
Supplement: Supplementary file 4. — For some of the xenodiagnosis experiments shown in Table 1, identification and quantification of parasite stages was performed by IFA on blood smears and skin sections.Stumpy forms were observed only in the blood of mice with parasitaemia values highlighted in light grey. Bioluminescence was detected in the skin of mice with values highlighted in dark grey. The number of parasites in the skin was calculated according to the values obtained in the standard in vitro assay (Table 1—source data 1) and is therefore probably an underestimate. Tsetse flies were dissected 2 days after xenodiagnosis. Populations of intermediate and stumpy form cells were assessed in blood smears and in successive skin sections stained either with the anti-CRD antibody or the anti-PAD1 antibody (see Materials and method section). Populations of early procyclic cells were assessed in dissected fly midguts stained with the anti-GPEET antibody (see Materials and method section). ND: not determined. DOI: http://dx.doi.org/10.7554/eLife.17716.025 [file elife-17716-supp4.xlsx]

## Sheet: Table S6
	Mouse blood		Mouse skin		Tsetse fly
Batches	Parasite density (per ml)	% PAD1+ parasites (n)	Parasite density (per cm2)	% PAD1+ parasites *	Dissected flies	Fly infection rate	% GPEET+ parasites in midgut (n)
C1	0	0% (0)	0	0	32	0	0% (0)
C	0	0% (0)	0	0	8	0	0% (0)
A4B	< 104	0% (0)	< 103	0.4	16	0	0% (0)
B1B	2.2 104	0% (0)	< 103	0.4	13	0	0% (0)
B1A	2.2 104	0% (0)	4.6 107	0.5	16	0.3125	100% (275)
A4A	< 104	0% (0)	6.6 105	0.8	17	0.352941	100% (221)
A2A	1.1 104	0% (0)	3.8 106	0.08	7	0.857143	100% (169)
B4B	4.3 106	39% (280)	6.7 107	0.33	10	0.8	100% (56)
B4A	4.3 106	39% (280)	6.7 107	0.33	17	1	ND
